# Supplementary material
Source: Elsevier journal article supplement (https://comptes-rendus.academie-sciences.fr/biologies/article/10.1016/j.crvi.2017.11.004/file/attach/mmc4.pdf)
Supplement: mmc4 [file mmc4.pdf]

## Données supplémentaires

**Figure S1. Caractéristiques ayant permis d'identifier les mâles labres oiseaux *Gomphosus caeruleus*.** A) L'extrémité du rayon supérieur de la nageoire caudale de ce mâle est sectionnée et le moignon est écorché. B) Les entailles sur le pédoncule caudal étaient fréquentes, mais celle-ci est la plus profonde qui ait été observée. C) Les mâles pouvaient aussi être identifiés grâce à la présence d'un liseré noir sur les nageoires dorsale et/ou anale. Ce liseré ainsi que la couleur de ces nageoires manifestent la jeunesse du mâle en question : il s'agit de résidus du stade intermédiaire entre la phase initiale femelle et la phase terminale mâle. D) Des écailles manquantes étaient parfois observées chez certains mâles.

**Figure S2. Comportements des labres oiseaux *Gomphosus caeruleus*.** A) Un mâle dominant cherche de la nourriture en compagnie d'un autre mâle pendant une pause d'un épisode de reproduction. B) Un mâle terminal (à gauche) et un individu en transition entre les phases initiale femelle et terminale mâle (à droite) nagent ensemble pacifiquement parmi les coraux. C) Ce regroupement soudain de sept femelles autour du massif de *Porites lutea* qui bornait la zone foyer de T1 du côté du rivage a eu lieu pendant un épisode de forte intensité. C'est au-dessus de ce massif qu'a eu lieu le plus grand nombre d'ascensions pendant la durée des observations. D-E) Interactions de type 1. Le mâle descend vers une femelle, corps penché et nageoires impaires déployées. Il ne stationnera pas au-dessus d'elle (D). Si une femelle se trouve au pied d'un massif d'*Acropora muricata*, le mâle se contente de passer au-dessus du massif sans la rejoindre, corps penché et nageoires impaires déployées (E). F-G) Interactions de type 2. Ces mâles se cambrent sans cesser de nager en passant au-dessus d'une femelle.

**Vidéo S1. Comportements de reproduction du labre oiseau *Gomphosus caeruleus*.** A) Ascension avec expulsion de gamètes. B) Ascension interrompue par la femelle. C) Ascension réussie à la quatrième tentative. D) Trois ascensions en quelques secondes avec trois femelles différentes. E) Cour du mâle et ascension avec deux individus portant la livrée des femelles. Possible interférence d'un mâle primaire. F) Ascension avec trois individus portant la livrée des femelles. Possible interférence de deux mâles primaires.

**Tableau S1. Données de terrain collectées durant les deux séries d'observations.**
